# Supplementary material
Source: publisher figshare collection journal article supplement (https://plos.figshare.com/articles/dataset/_/11928705)
Supplement: Supplementary file [file 1]

Fig 2: AQP2 protein expression

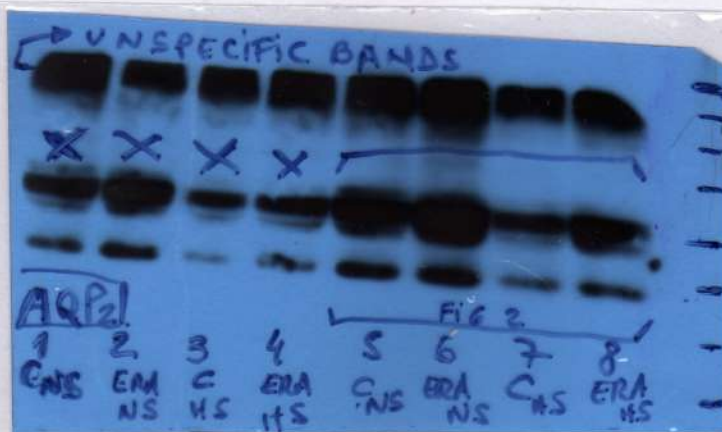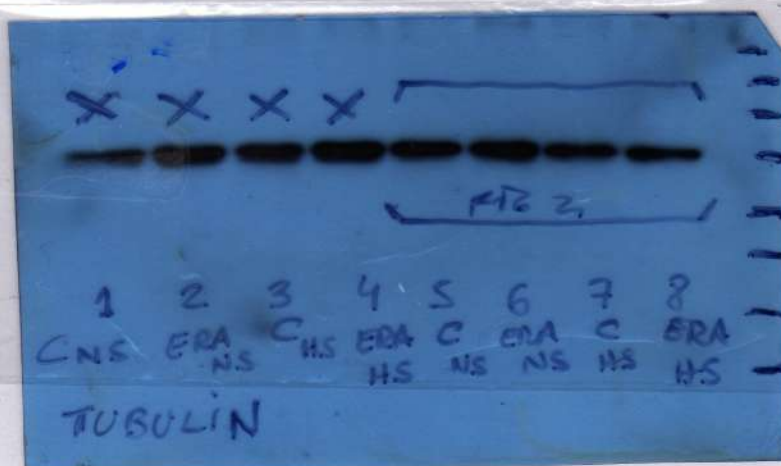

CNS: Control / normosodic diet

CHS: Control / high sodium diet

ERA<sub>NS</sub>: endothelin receptor antagonist treatment / normosodic diet

ERA<sub>HS</sub>: endothelin receptor antagonist treatment / high sodium diet

# Fig 3- $\alpha$ -ENaC expression

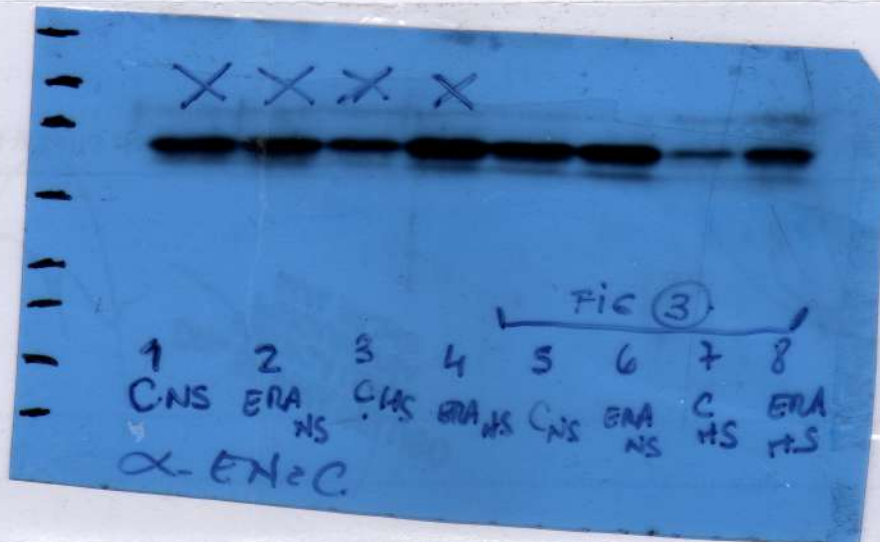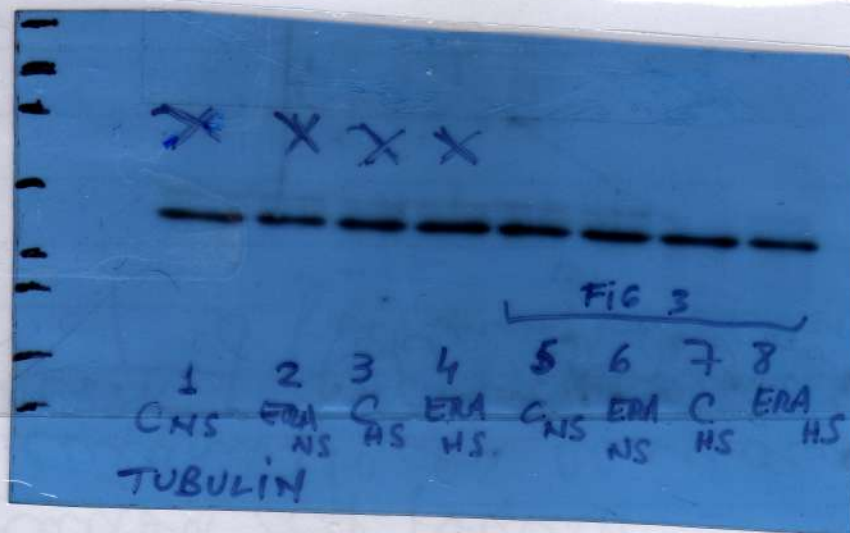

CNS = Control / normosodic diet

CNS = Control / ~~norm~~ high sodium diet

ERANS = endothelin receptor antagonist treatment / normosodic diet

ERAHS = endothelin receptor antagonist treatment / high sodium diet



- Method used to capture the images of the slots  
Epson stylus Cx5600 Scan

- Molecular weight markers:  
(tris-cla gel)

| BIO-RAD                          |                                                     |                                                     | Prestained SDS-PAGE Standards<br>Broad Range |  |
|----------------------------------|-----------------------------------------------------|-----------------------------------------------------|----------------------------------------------|--|
| Catalog 161-0318, Control 310010 |                                                     |                                                     |                                              |  |
| Protein                          | Calibrated<br>MW (daltons) on<br>4-20% Tris-HCl gel | Calibrated<br>MW (daltons) on<br>4-12% Bis-Tris gel |                                              |  |
| Myosin                           | 211,475                                             | 196,439                                             |                                              |  |
| $\beta$ -Galactosidase           | 118,579                                             | 102,686                                             |                                              |  |
| BSA                              | 78,995                                              | 57,161                                              |                                              |  |
| Ovalbumin                        | 53,045                                              | 41,485                                              |                                              |  |
| Carbonic anhydrase               | 36,881                                              | 27,840                                              |                                              |  |
| Soybean trypsin inhibitor        | 28,643                                              | 20,613                                              |                                              |  |
| Lysozyme                         | 17,809                                              | 15,044                                              |                                              |  |
| Aprotinin                        | 6,435                                               | 6,445                                               |                                              |  |

S 60  
CL1610318 Rev D

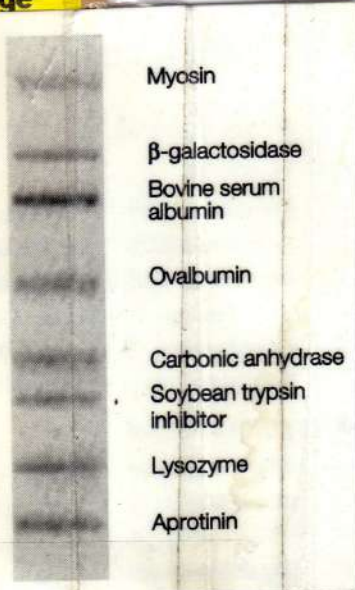

Myosin  
 $\beta$ -galactosidase  
Bovine serum albumin  
Ovalbumin  
Carbonic anhydrase  
Soybean trypsin inhibitor  
Lysozyme  
Aprotinin
